# Supplementary material
Source: publisher figshare collection journal article supplement (https://geolsoc.figshare.com/ndownloader/files/27655717)
Supplement: Supplementary file 1 [file 27655717]

**Supplementary Material**

**CO2 mineral trapping comparison in different regions: Predicted geochemical reactivity of the Precipice Sandstone reservoir and overlying Evergreen Formation**

**J.K. Pearce1,2*, A.D. La Croix1,3, F.J. Brink4, P.J. Hayes1, J.R. Underschultz1,**

*1Centre for Natural Gas, University of Queensland, St Lucia, QLD 4072, Australia*

*2School of Earth and Environmental Sciences, University of Queensland, St Lucia, QLD 4072, Australia*

*3Earth Sciences, University of Waikato, Hamilton 3240, New Zealand*

*4 Centre for Advanced Microscopy, Australian National University, ACT, Australia*

**corresponding author: Julie Pearce, J.pearce2@uq.edu.au*

Keywords: Geochemical modelling; Surat Basin; Precipice Sandstone; Evergreen Formation; CO2 sequestration; Cap-rock;


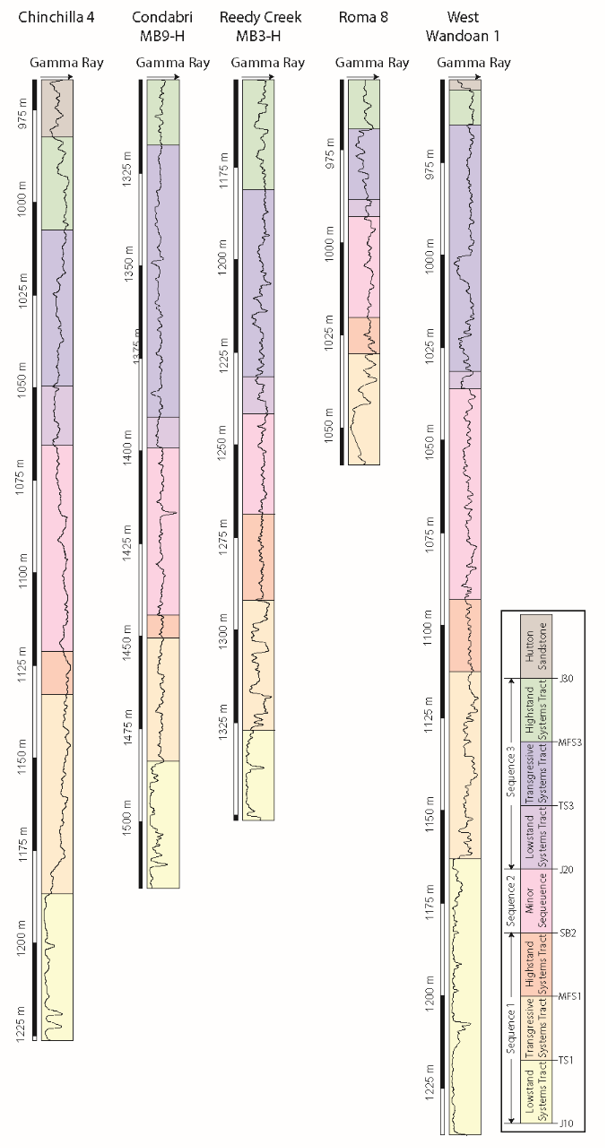


Figure S1: Gamma ray logs for the wells discussed and colour key for sequences. The Precipice Sandstone is the Lowstand Systems Tract of sequence 1.

Table S1: The kinetic and thermodynamic parameters used for geochemical modelling input as mineral script files (Köhler et al., 2003; Lowson et al., 2007; Palandri and Kharaka, 2004; Steefel, 2001). As are the input mineral reactive surface areas,  is the pre exponential factor for nucleation. Methods have been described in detail including the reaction rate equations in Pearce et al., (2015). The reaction rate equation used was based on transition state theory (Lasaga, 1995). Precipitation rates were based on the modified nucleation theory and the non-linear portion of the BCF crystal growth theory (Pham et al., 2011).

| **Mineral** | **K25(acid)**  mol/cm2/s | **Ea(acid)** kJ/mol | **n** | **K25(neut)** mol/cm2/s | **Ea(neut)** kJ/mol | **As**cm2/g | **K(precip)** mol/cm2/s | **** |
| --- | --- | --- | --- | --- | --- | --- | --- | --- |
| Chalcedony |  |  |  | 1.70E-17 | 68.70 | 10 | K(diss) | 2E+10 |
| K-feldspar | 8.71E-15 | 51.7 | 0.500 | 3.89E-17 | 38.00 | 10 | K(diss) | 2E+10 |
| Albite | 6.92E-15 | 65.0 | 0.457 | 2.75E-17 | 69.80 | 10 | K(diss) | 2E+10 |
| Andesine | 1.318E-13 | 53.5 | 0.541 | 7.59E-14 | 57.40 | 10 | K(diss) | 2E+10 |
| Kaolinite | 4.90E-16 | 65.9 | 0.777 | 6.61E-18 | 22.20 | 70 | K(diss)/10 | 2E+10 |
| Illite/  Muscovite | 1.91E-16 | 46.0 | 0.600 | 8.91E-20 | 14.00 | 70 | K(diss) | 2E+10 |
| Smectite | 1.05E-15 | 23.6 | 0.340 | 1.66E-17 | 35.00 | 70 | K(diss) | 2E+10 |
| Biotite | 1.45E-14 | 22.0 | 0.525 | 2.82E-17 | 22.00 | 30 | K(diss) | 2E+10 |
| Fe-Mg-Chlorite | 1.62E-14 | 25.1 | 0.490 | 1.00E-17 | 94.30 | 70 | K(diss) | 2E+10 |
| Calcite | 5.01E-05 | 14.4 | 1.000 | 1.55E-10 | 23.50 | 0.05 | K(diss) | 1E+10 |
| Ankerite | 1.59E-08 | 45.0 | 0.900 | 1.26E-13 | 62.76 | 0.05 | K(diss)/1e5 | 3E+10 |
| Siderite | 1.59E-08 | 45.0 | 0.900 | 1.26E-13 | 62.76 | 0.05 | K(diss) | 2E+10 |
| Fe-oxide | 4.07E-14 | 66.2 | 1.000 | 2.51E-19 | 66.20 | 70 | K(diss) | 1E+10 |
| Pyrite | 3.02E-12 | 56.9 | 0.5 | 2.82E-09 | 56.90 | 10 | K(diss) | 2E+10 |

Table S2. Water chemistries (mg/kg) used as input (APLNG, 2013; Prommer et al., 2016). Water chemistry 1 (from data on the Reedy Creek Precipice Sandstone) was used for Reedy Creek MB3-H and Roma 8 models, water chemistry 2 was used for models of Condabri MB8-H (from data on the Condabri Precipice Sandstone). Charge balance was set on bicarbonate, limit of analysis was used for Al and SO4.

|  | Water chemistry 1 | Water Chemistry 2 |
| --- | --- | --- |
| Cl | 70 | 1669 |
| Na | 157 | 1502 |
| Ca | 1 | 105 |
| Al | 0.01 | 0.01 |
| Fe | 0.28 | 0.34 |
| K | 3 | 48.9 |
| Mg | 1 | 14 |
| SiO2 | 3 | 28 |
| HCO3 | 148 | 982 |
| SO4 | 1 | 1 |
| pH | 8.2 | 6.5 |

Table S3: See separate excel file of QEMSCAN modal mineral components and porosity for the following rock samples and sub areas within and adjacent to the fracture fills: West Wandoan 1 Precipice Sandstone 1165.4 m, Chinchilla 4 Evergreen Formation 1101.1 m, Chinchilla 4 Westgrove Ironstone 1032.84 m, West Wandoan 1 Westgrove Ironstone 1017.1 m.


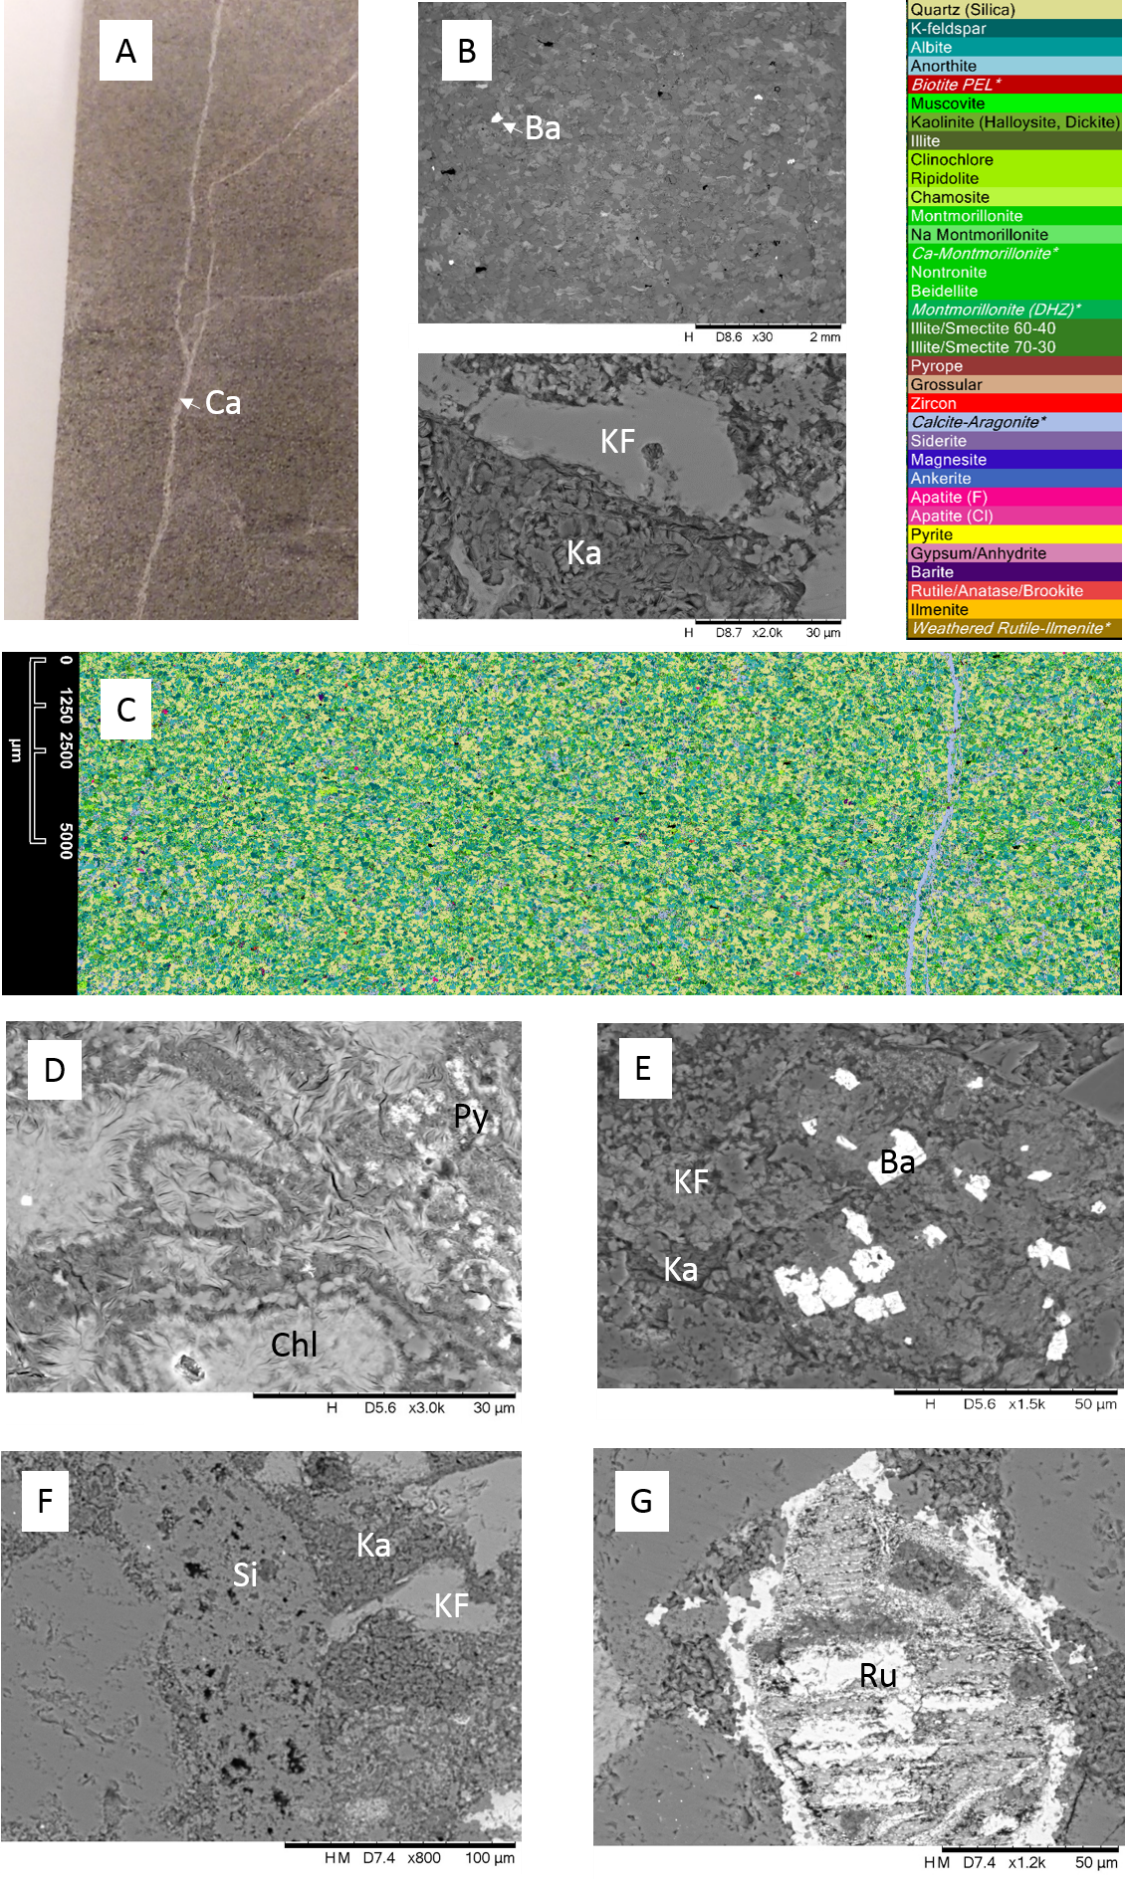


Figure S2: SEM images: Chinchilla 4 Evergreen Formation core Facies 10 from 1101.1 m with a natural fracture filled with calcite in A) – E). A) Photo of slabbed core section with calcite filled fracture (Ca). B) SEM images of Barite (Ba) cement and framework grains, and K-feldspar (KF) weathered to kaolinite (Ka). C) QEMSCAN image of a section of core where part of the calcite filled fracture is in blue, the QEMSCAN mineral legend is also shown above. D) Chlorite (Chl) and pyrite (Py) adjacent to the fracture. E) Barite cement, and K-feldspar weathered to kaolinite. F) Chinchilla 4 Evergreen Formation Facies 4 from 1154.1 m with K-feldspar weathered to kaolinite, and silica cement (Si). G) Chinchilla 4 Evergreen Formation Facies 4 from 1154.1 m with rutile cements (Ru) and weathered grain.


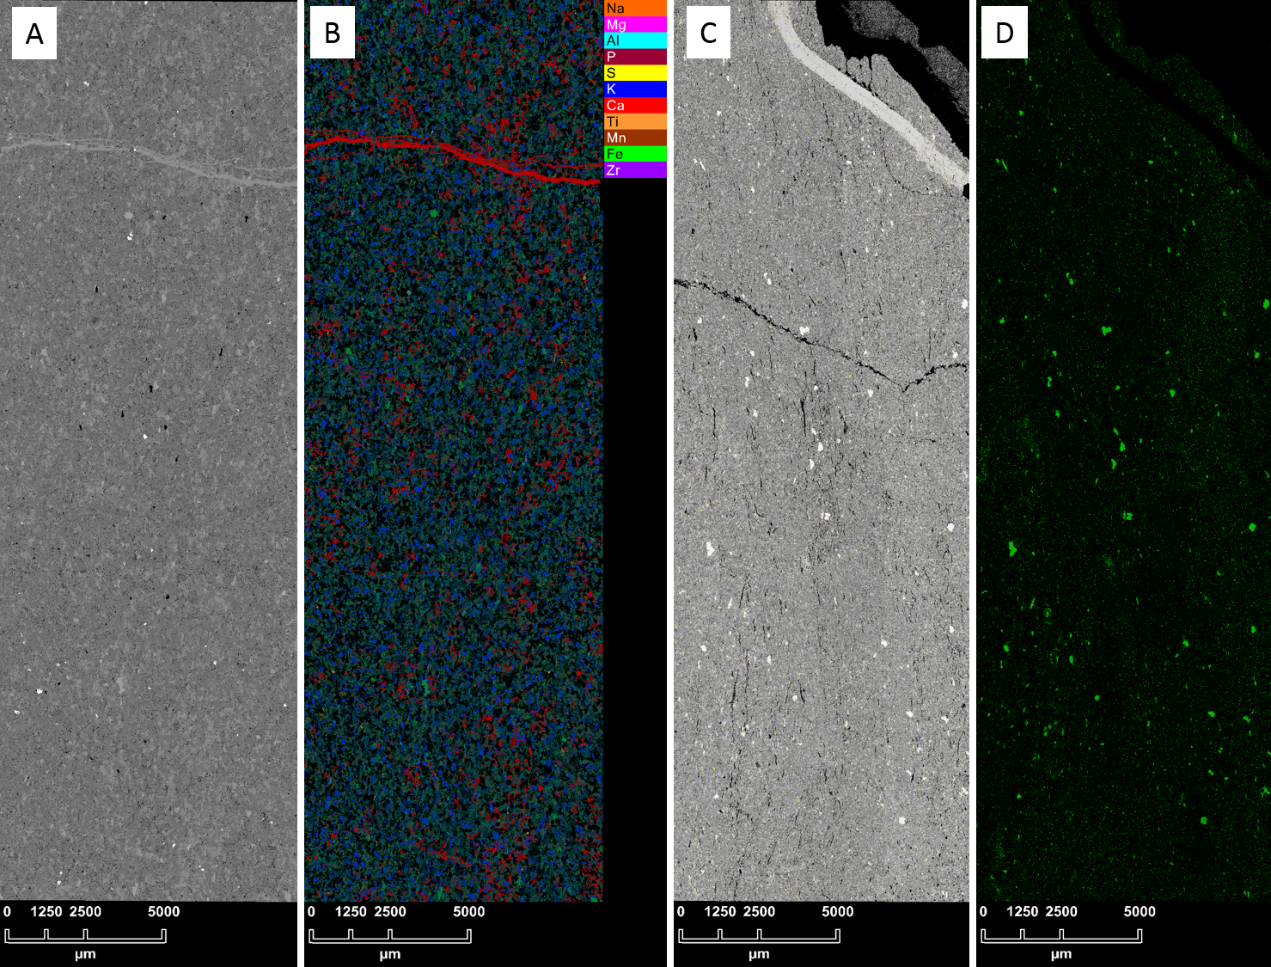


Figure S3: SEM BSE and element images from QEMSCAN analysis. A) BSE image and B) element image of Evergreen Formation Facies 10 with a calcite cemented natural fracture (Chinchilla 4 well 1101.1 m). C) BSE and D) Fe element images of Westgrove Ironstone 1032.84 m (Chinchilla 4 well, Facies 11) with patchy siderite cements and a calcite filled fracture. The bedding plane is in the vertical axis in these images.


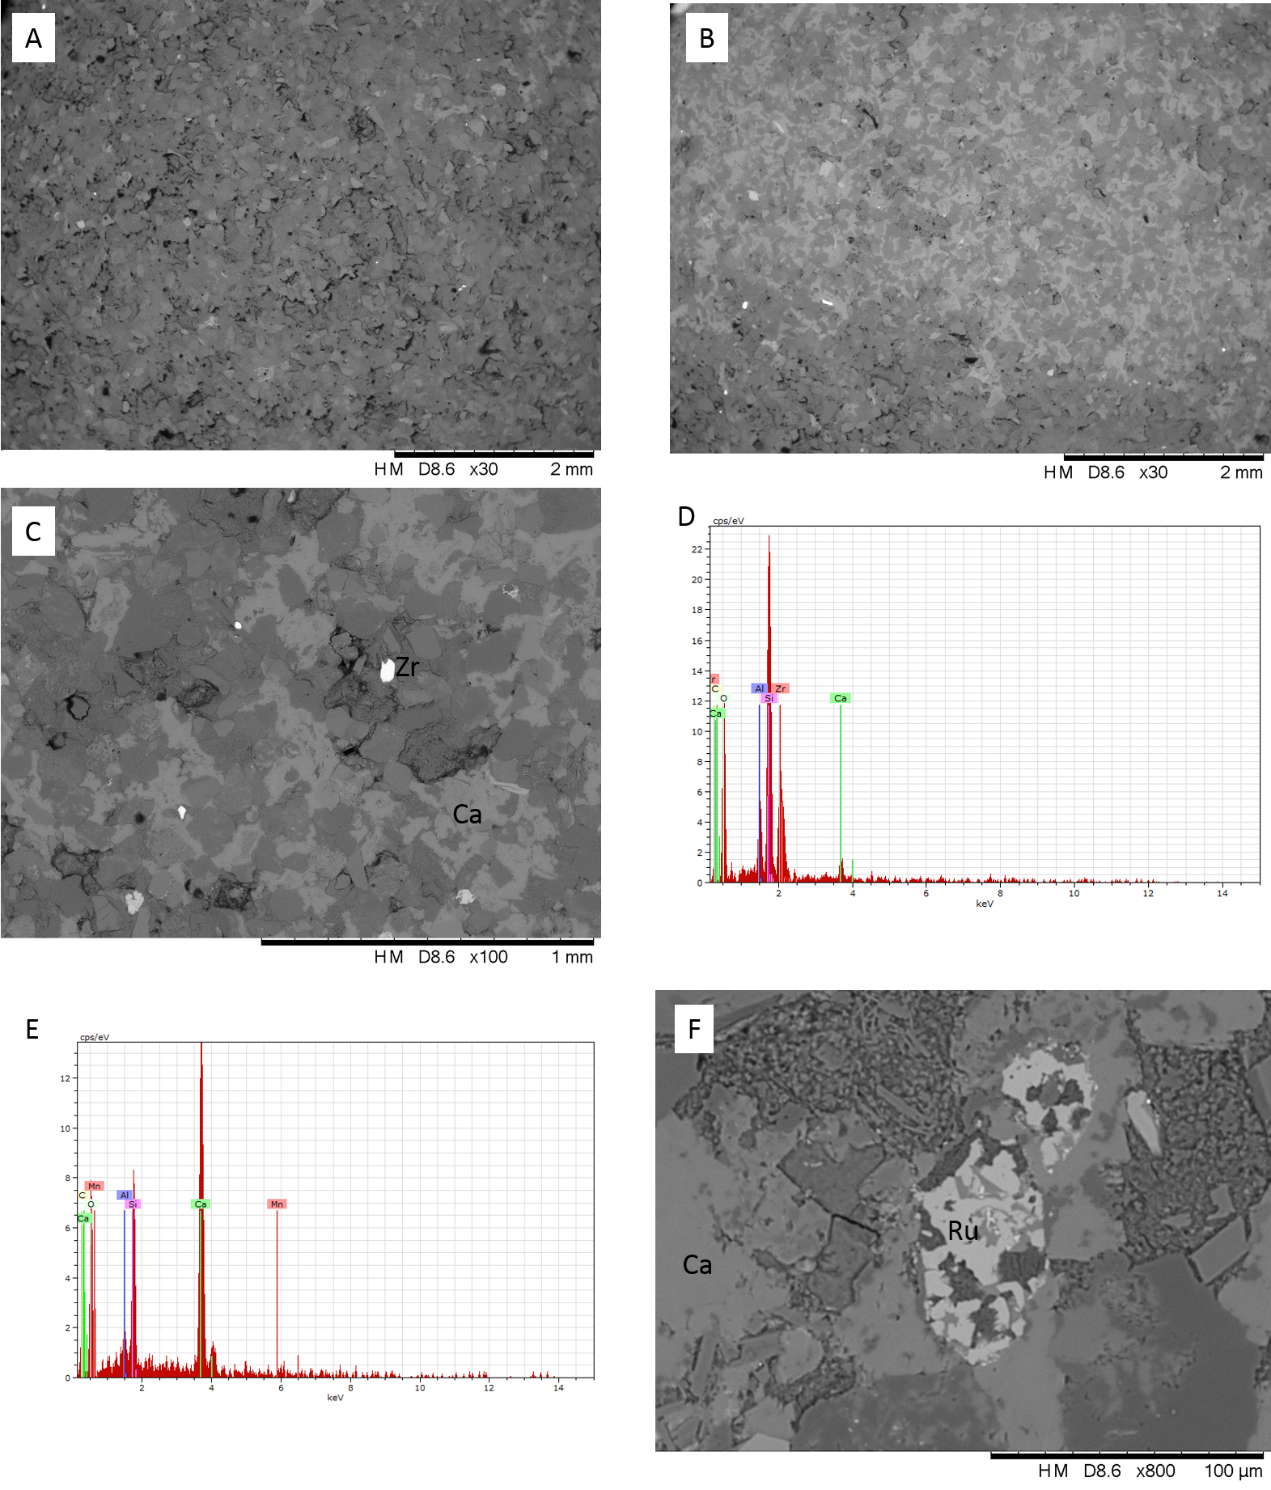


Figure S4: SEM and EDS images of Reedy Creek MB3-H Evergreen Formation 1250.2 m Facies 10. A) Framework grains, B) calcite cemented section. C) Calcite cement and zircon grain. D) EDS spectrum of zircon. E) EDS spectrum of calcite. F) Rutile and calcite cements. Zr = zircon, Ca = calcite, Ru = rutile.


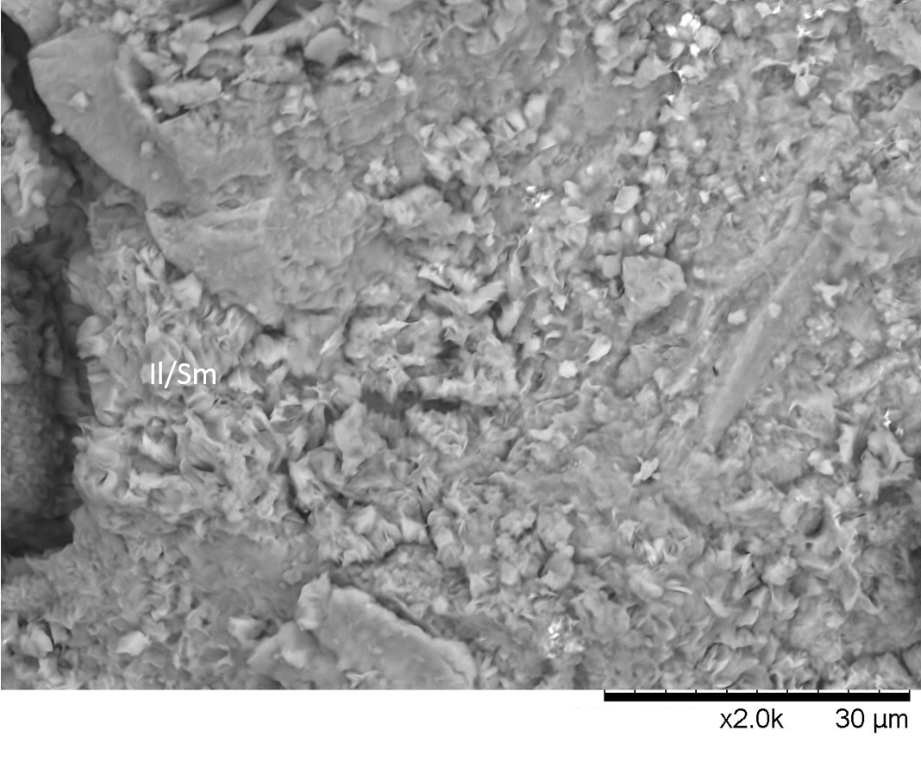


Figure S5: SEM image of illite/smectite (Il/Sm) in Reedy Creek MB3-H Evergreen Formation 1250.2 m Facies 10.


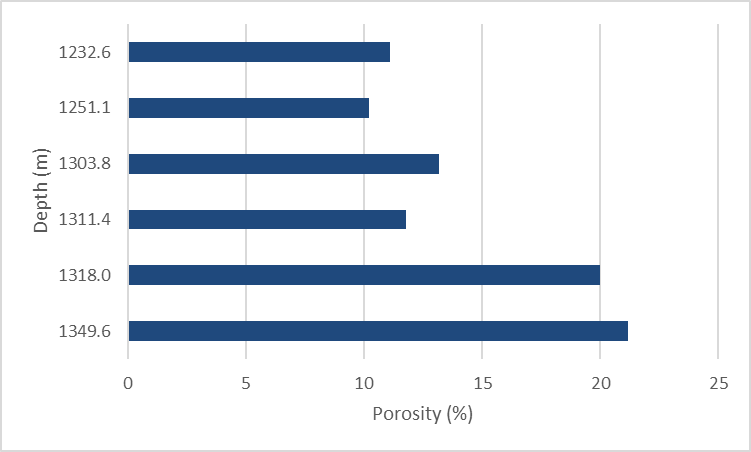


Figure S6: Helium porosity (%) reported in selected Reedy Creek MB3-H core by depth, used for geochemical model input. Where the deepest sample with the highest porosity is from the Precipice Sandstone Facies 3. Created from data in (APLNG, 2013; Prommer et al., 2016).


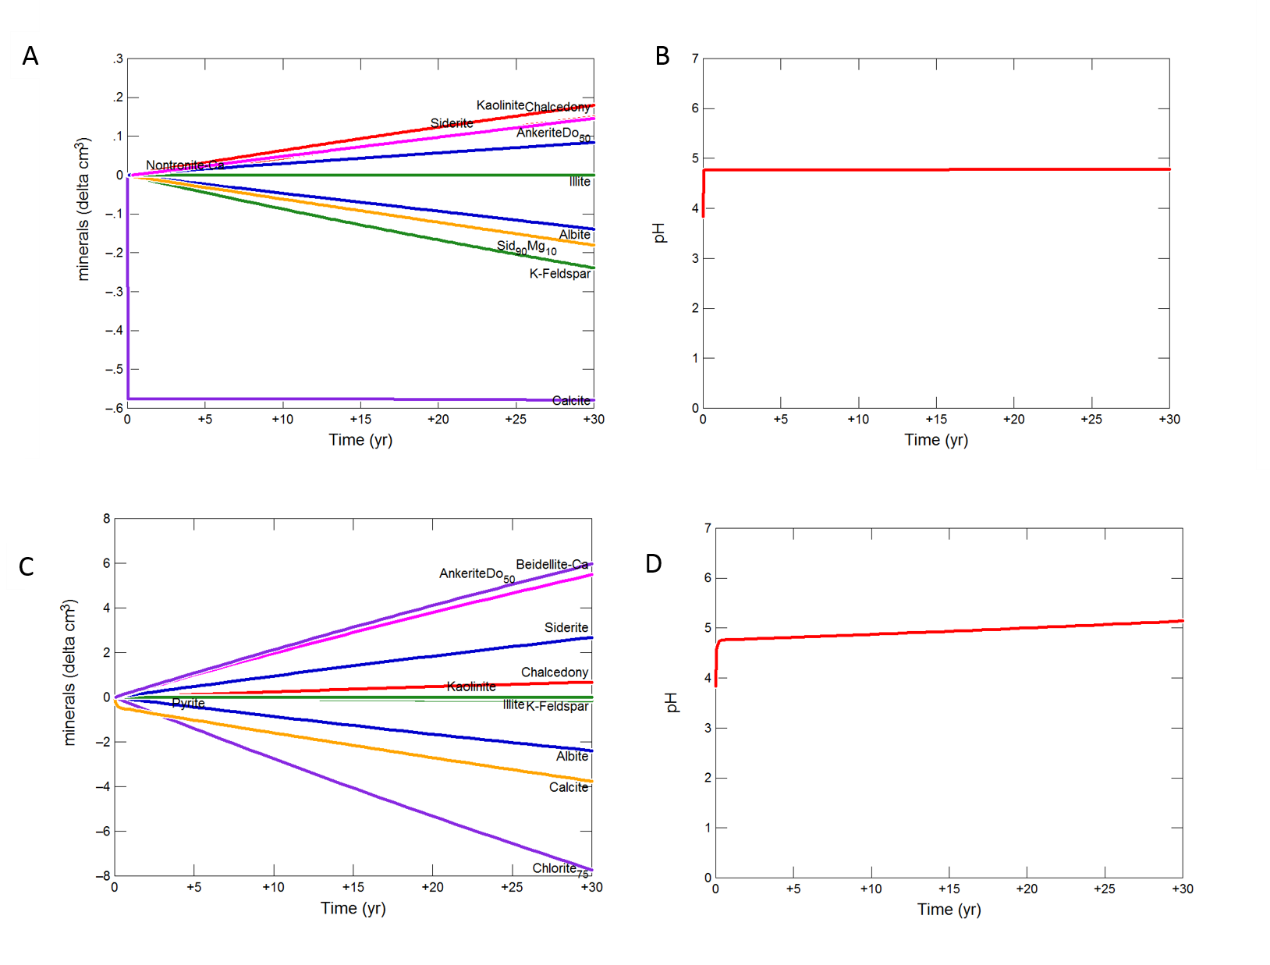


Figure S7: Reedy Creek MB3-H well core geochemical model output. A) and B) Evergreen Facies 4 1303.8m. C) and D) Evergreen (Boxvale Sandstone) Facies 9 1232.6 m.


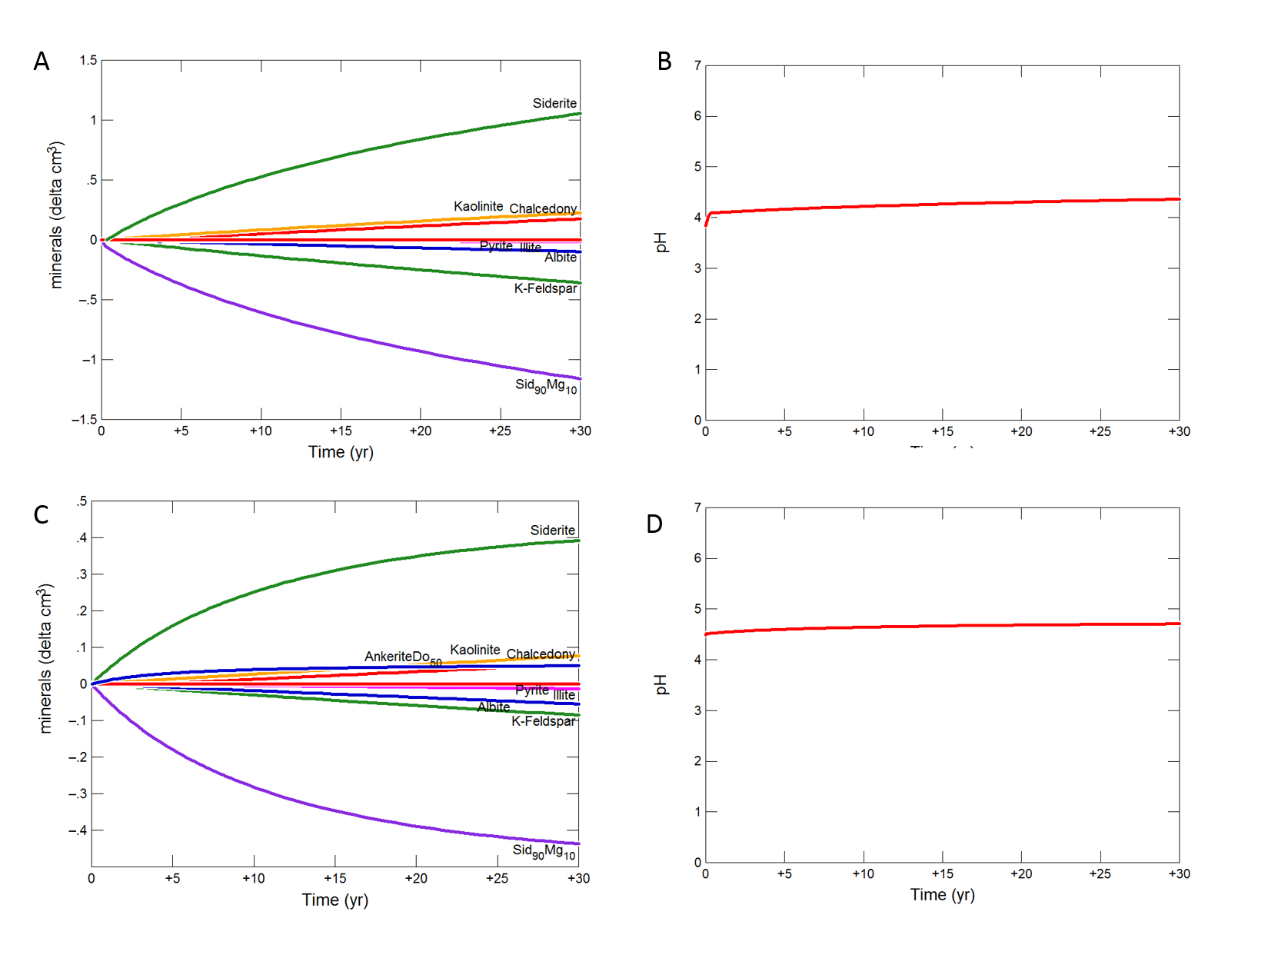


Figure S8: Geochemical models of CO2 reactions. A) and B) Reedy Creek MB3-H well core predicted change in minerals and pH for Evergreen Facies 4 1318.0 m. C) and D) Condabri MB9-H Evergreen Formation 1476.0 m Facies 11.


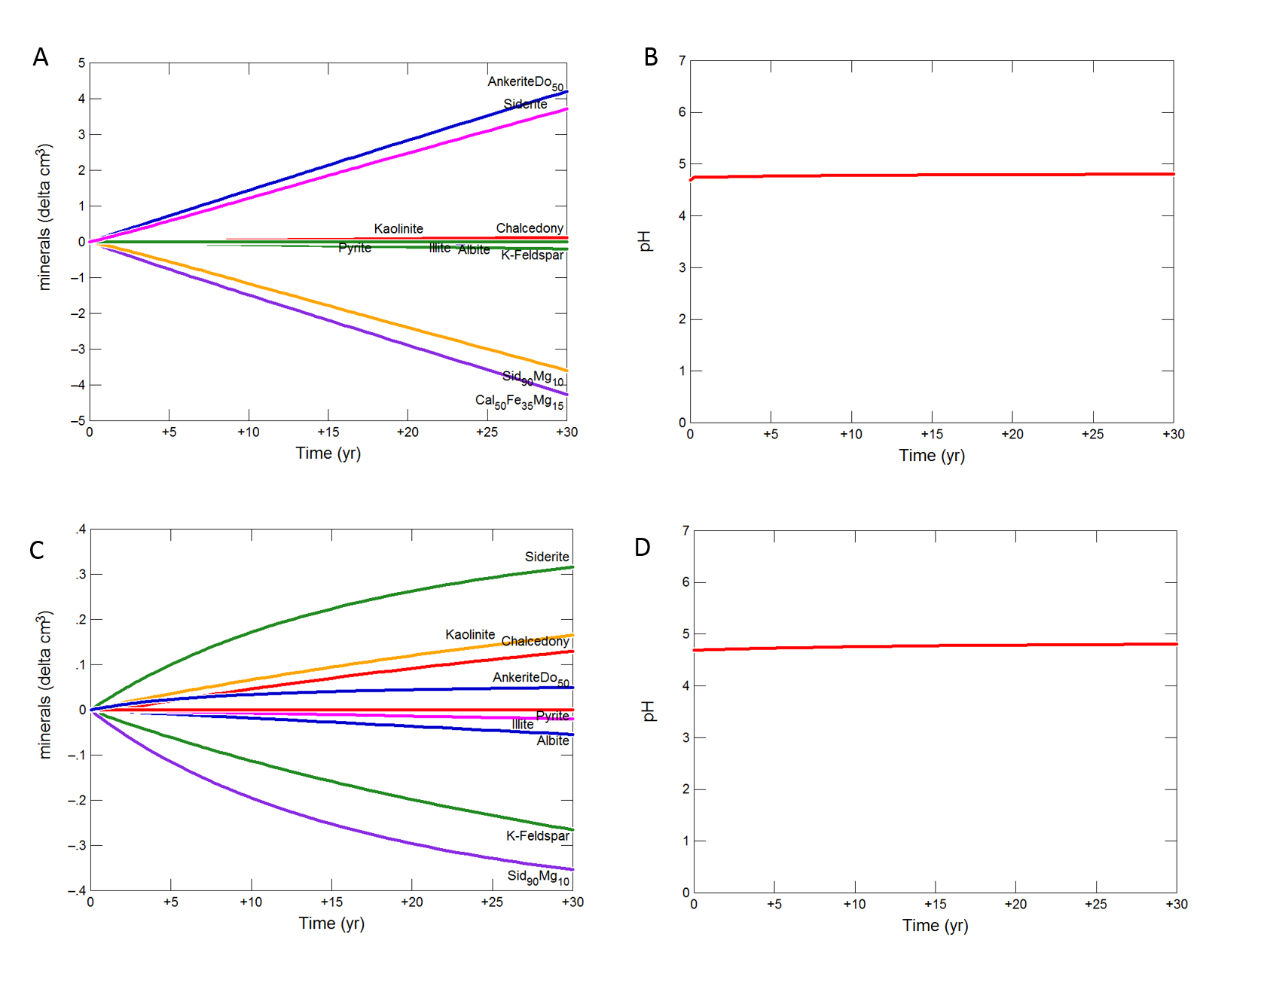


Figure S9: Geochemical models of the Condabri MB9-H Moolayember Formation basement. A) and B) Change in minerals and pH for 1545.7 m. C) and D) Change in minerals and pH for 1538.2 m.


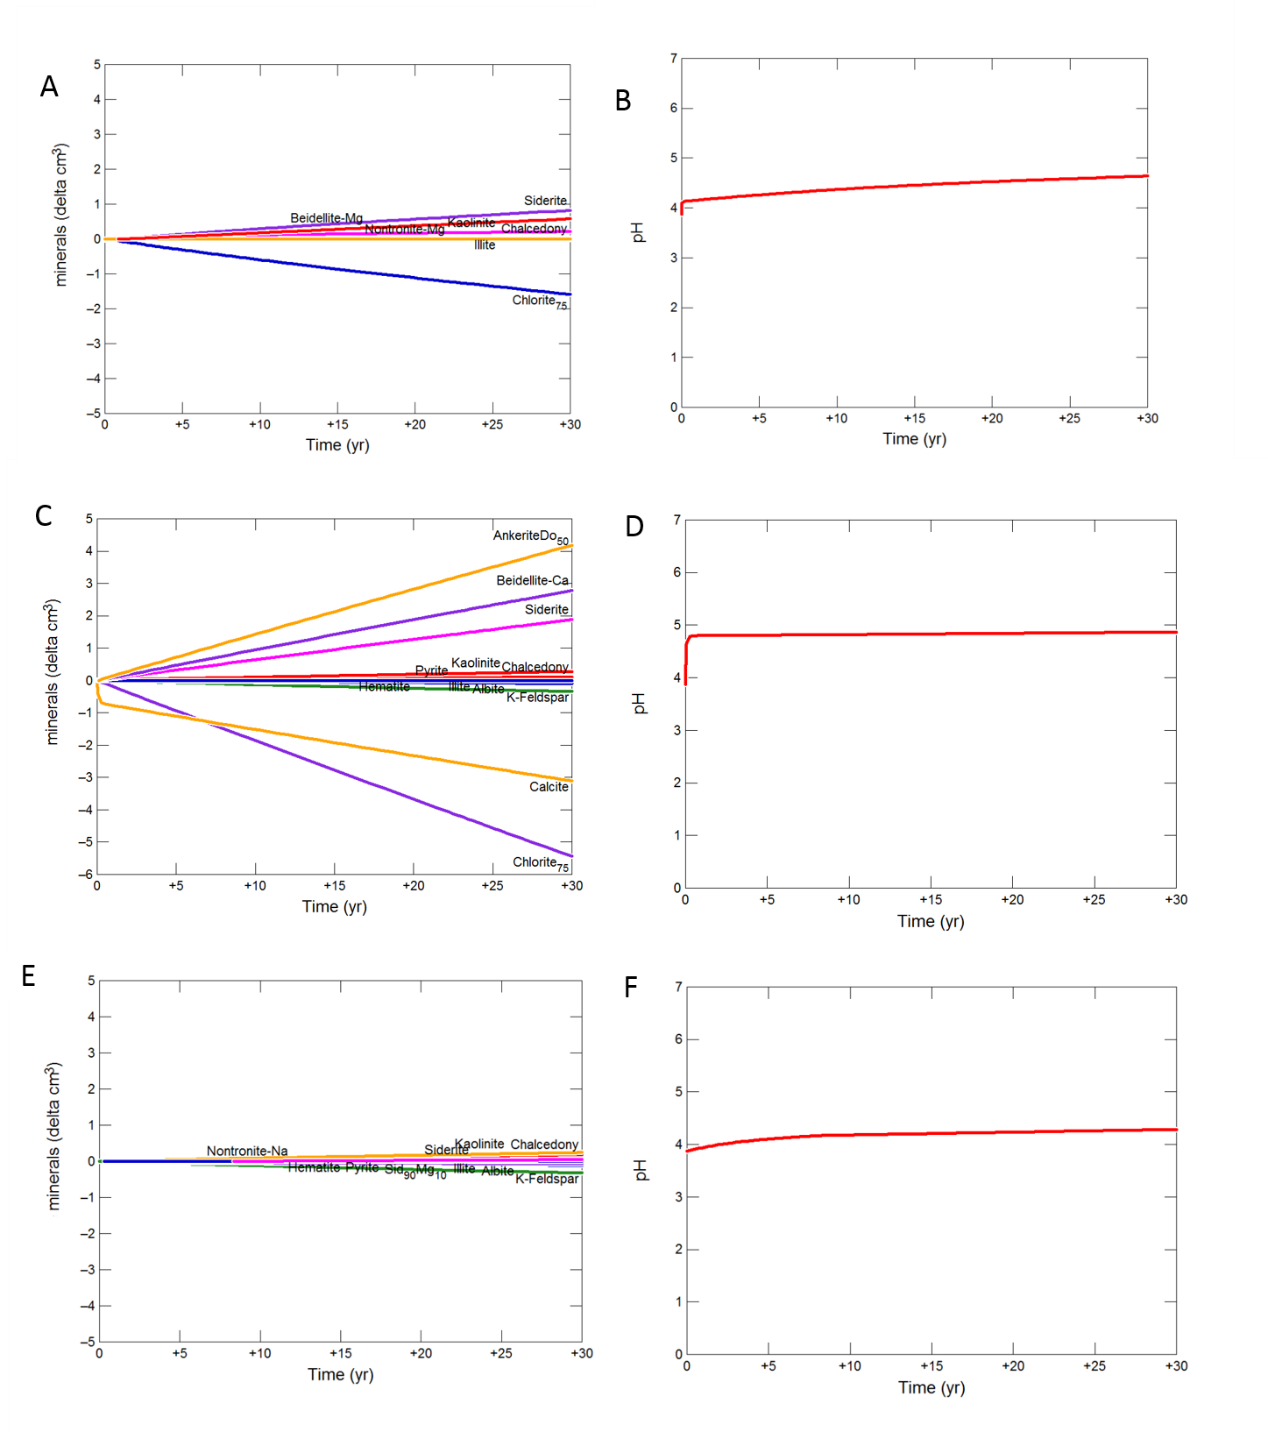


Figure S10: Geochemical models over 30 years CO2 reaction for Roma 8. A) and B) Moolayember Formation basement 1062.7 m. C) and D) Evergreen Formation Facies 4 1058.6 m reaction with CO2 and 100 ppm SO2. E) and F) Evergreen Formation 1043.6 m Facies 10.


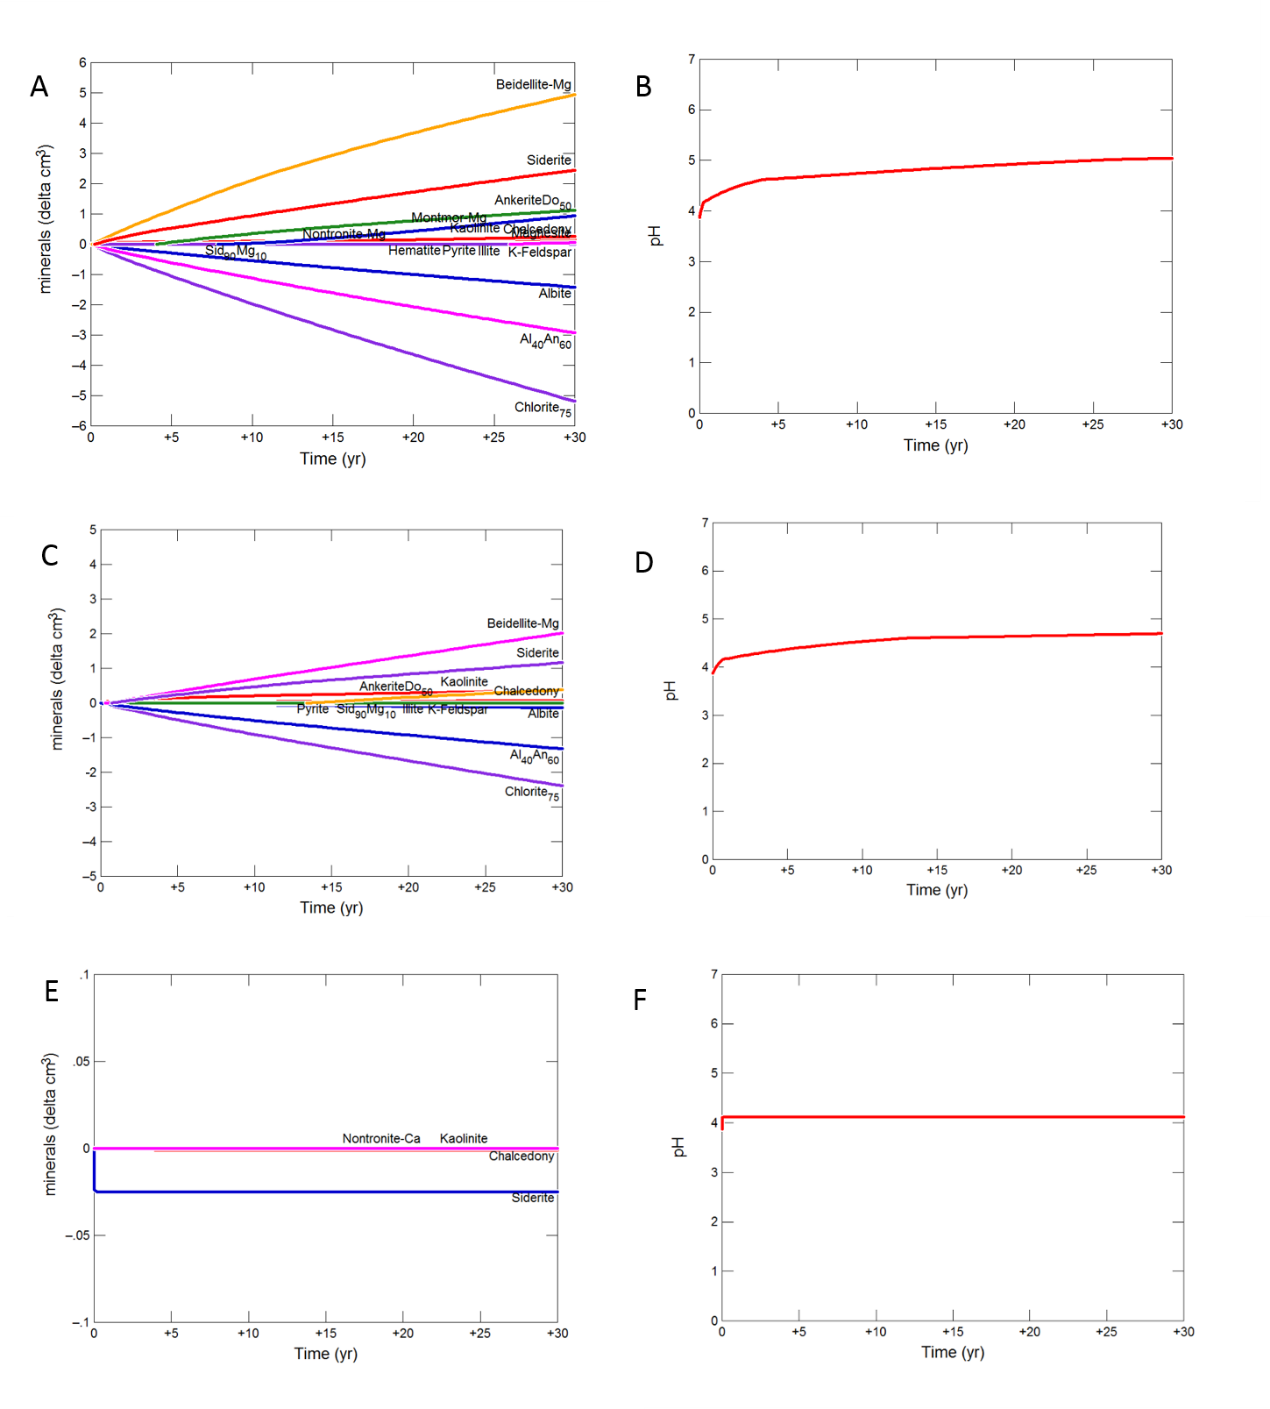


Figure S11: Roma 8 well predicted change in minerals and pH over 30 years CO2 reaction. A) and B) Evergreen Formation 990.5 m Facies 10. C) and D) Westgrove Ironstone Member 980.3 m Facies 4. E) and F) Westgrove Ironstone Member 978.2 m Facies 15A.
